# Supplementary material for: Association of mitochondrial DNA haplogroups J and K with low response in exercise training among Finnish military conscripts
Source: PubMed Central journal article supplement (PMC7821635; doi:10.1186/s12864-021-07383-x), 2021-01-22
Supplement: 12864_2021_7383_MOESM3_ESM.pdf [file 12864_2021_7383_MOESM3_ESM.pdf]

Table S3. Association of clinical variables and mtDNA haplogroups J and K with Cooper test 1 distance in the best performing quartile of conscripts.

| Source                                   | Type III Sum of Squares | df  | Mean Square          | F        | p-value*              |
|------------------------------------------|-------------------------|-----|----------------------|----------|-----------------------|
| Corrected Model                          | .013 <sup>a</sup>       | 8   | 0.002                | 4.100    | 1.7x10 <sup>-4</sup>  |
| Intercept                                | 0.657                   | 1   | 0.657                | 1666.212 | 2.1x10 <sup>-90</sup> |
| Haplogroups JK vs non-JK                 | 3.7x10 <sup>-6</sup>    | 1   | 3.7x10 <sup>-6</sup> | 0.009    | 0.92                  |
| Body mass index (kg/m <sup>2</sup> )     | 3.4x10 <sup>-5</sup>    | 1   | 3.4x10 <sup>-5</sup> | 0.086    | 0.77                  |
| Log body fat (%)                         | 2.8x10 <sup>-4</sup>    | 1   | 2.8x10 <sup>-4</sup> | 0.702    | 0.40                  |
| Log visceral fat area (cm <sup>2</sup> ) | .009                    | 1   | 0.009                | 23.813   | 2.0x10 <sup>-6</sup>  |
| Log fat-free body mass (kg)              | .001                    | 1   | 0.001                | 2.282    | 0.13                  |
| Log systolic blood pressure (mmHg)       | .001                    | 1   | 0.001                | 1.511    | 0.22                  |
| Log fasting plasma glucose (mmol/l)      | 7.5x10 <sup>-6</sup>    | 1   | 7.5x10 <sup>-6</sup> | 0.019    | 0.89                  |
| Log total plasma cholesterol (mmol/l)    | 1.4x10 <sup>-4</sup>    | 1   | 1.4x10 <sup>-4</sup> | 0.360    | 0.55                  |
| Error                                    | .068                    | 172 | 3.9x10 <sup>-4</sup> |          |                       |
| Total                                    | 2194.884                | 181 |                      |          |                       |
| Corrected Total                          | .081                    | 180 |                      |          |                       |

\*Univariate GLM analysis; <sup>a</sup>R Squared = .160 (Adjusted R Squared = .121); dependent variable, Logarithm of the Cooper test results.
